# Supplementary material for: Farreras, una exposición necesaria
Source: Royal Society of Chemistry journal article supplement (doi:10.1039/b416736h), 2000-01-01
Supplement: b416736h.doc [file b416736h.doc]

**Electronic Supplementary Information**

**Supramolecular porphyrin-fullerene via ‘two-point’ binding strategy: Axial-coordination and cation-crown ether complexation**

Francis D’Souza,a* Raghu Chitta,a Suresh Gadde,a Melvin E. Zandler,a Atula S. D. Sandanayaka,b Yasuyuki Araki,b and Osamu Itob*

aDepartment of Chemistry, Wichita State University, Wichita, KS 67260-0051, USA, E-mail: [Francis.DSouza@wichita.edu](mailto:Francis.DSouza@wichita.edu)

bInstitute of Multidisciplinary Research for Advanced Materials, Tohoku University, Katahira, Sendai, 980-8577, E-mail: [ito@tagen.tohoku.ac.jp](mailto:ito@tagen.tohoku.ac.jp)

**Total = 8 pages**

**Experimental Section**

**Chemicals**. Buckminsterfullerene, C60 (+99.95%) was from SES Research, (Houston, TX). Benzonitrile in sure seal bottle, and other reagents used were from Aldrich Chemicals (Milwaukee, WI). All the chromatographic materials and solvents were procured from Fisher Scientific and were used as received.

**Synthesis of porphyrin and fullerene derivatives**

**H2-5–( 2-hydroxyphenyl)-10, 15, 20-triphenylporphyrin (1):** This compound was synthesized according to the literature procedure.1,2 1H NMR (CHCl3-d):  (in ppm) 8.89 – 8.84 (m, 8H, **-pyrrolic*H* ), 8.23 – 8.17 ( m, 6H, *o*-phenyl*H* ), 8.0 – 7.96 (dd, 2H, *o,m-H*- meso-substituted phenyl), 7.78 – 7.64 (m, 9H, *m, p*-phenyl*H*), 7.33 – 7.26 (m, 2H, *m, p*- *H*-meso-substituted phenyl), 5.0 (s, br, 1H, OH).

**4’-Formylbenzo-[18-crown-6]** **(2)**: This compound was synthesized according to the following procedure.

A mixture of 3,4-dihydroxybenzaldehyde (1 g, 7.24 mmol) and excess K2CO3 (5.0031g, 36.2 mmol) taken in DMF (~ 50 ml) was stirred at ~80 0C under nitrogen for 30 min. Then pentaethylene glycol di-*p*-toluene sulfonate (3.483 ml, 7.9641 mmol) was added to the reaction mixture during 20 minutes, and stirred at ~800C under nitrogen atmosphere for 20 hours. The cooled mixture was filtered and the filtrate was evaporated to dryness and the residue was extracted with chloroform. The extract was evaporated to yield a viscous oil which was purified through column chromatography over silica gel using CHCl3:MeOH (98:2 v/v) as eluent. Evaporation of the solvent yielded pale-yellow oil, which upon triturating with diethyl ether and refrigeration gave the desired product as white solid. Yield : ~75%. 1H NMR ( CHCl3-d): (in ppm) 9.84 (s, 1H ), 7.44 (dd, 1H, phenyl *H*), 7.39 (d, 1H, phenyl *H* ), 6.95 (d, 1H, phenyl *H* ), 4.28 – 4.18 (m, 4H, crown ethylene *H*), 4.02 – 3.90 (m, 4H, crownethylene *H*), 3.82 – 3.71 (m, 8H, crownethylene *H* ), 3.69 (s, 4H, crownethylene *H*).

**4’-Hydroxymethylbenzo-[18-crown-6] (3):** This compound was obtained by reduction of the above synthesized formyl-derivative using a procedure described by Kryatova et al.3 4’-Formylbenzo-[18-crown-6] **(3)** (1g, 2.93 mmol) was suspended in 15 ml of absolute ethanol, and the mixture was cooled to 00C. Sodium borohydride (125 mg, 3.3 mmol) was added to this suspension in small portions, maintaining the temperature below 70C. After the addition of sodium borohydride, the mixture was stirred at 00C for 2 hours and the solvent was rotary evaporated. The residue was washed with water and extracted with CH2Cl2. Yield : ~85% 1H NMR (CHCl3-d): (in ppm) 6.92 (d, 1H, phenyl *H*), 6.88 – 6.78 (m, 2H, phenyl *H*), 4.60 (s, 2H, benzyl *H*), 4.22 – 4.06 (m, 4H, crown ethylene *H*), 3.98 – 3.82 (m, 4H, crown ethylene *H*), 3.80 – 3.58 (m, 12H, crown ethylene *H*), 2.20 (br, s, 1H).

**4’-Chloromethylbenzo-[18-crown-6] (4):** This compound was prepared according to Kryatova et al1. Hydroxymethylbenzo-[18-crown-6] (200 mg, 0.59 mmol) was dissolved 15 ml of CH2Cl2, and fine powder of K2CO3 (270 mg, 1.954 mmol) was added. The mixture was cooled to 00C under N2, and thionyl chloride (96 L, 1.31 mmol) was added. The reaction was stirred for 1 hour, then filtered and the solvent was evaporated to give semi-solid product, which was used without further purification. Yield: ~90%. 1H NMR (CHCl3-d) : (in ppm) 6.92 (m, 2H, phenyl*H* ), 6.82 (d, 1H, phenyl*H* ), 4.55 (s, 2H, benzyl*H* ), 4.24 – 4.10 (m, 4H, crownethylene*H* ), 4.0 – 3.84 (m, 4H, crownethylene*H*), 3.80 – 3.60 (m, 12H, crownethylene).

**H2TPP-*o-*benzo-[18-crown-6] (5):** A mixture of 2-OHTPP **(1)** (335 mg, 0.53 mmol) and excess K2CO3 (220 mg, 1.592 mmol) taken in DMF (~ 50 ml) was stirred at ~800C under nitrogen for 30 min. Then, 4’-Chloromethylbenzo-[18-crown-6] **(4)** (190 mg, 0.53 mmol) dissolved in minimum amount of DMF was added to the reaction mixture during 20 minutes, and stirred at ~800C under nitrogen atmosphere for 18 hours. The cooled mixture was filtered and the filterate was evaporated to dryness and the residue was extracted with chloroform. The extract was evaporated and the residue was subjected column chromatography over basic alumina. The desired compound was eluted with CH2Cl2 : EtOAc ( 80:20 v/v). Yield : ~85%. 1H NMR (CHCl3-d) : (in ppm) 8.92 – 8.78 (m, 8H, **-pyrrolic*H*), 8.34 – 8.12 (m, 6H, *o*-phenyl*H*), 8.05 (dd, 1H, ortho-*H*- meso-substituted phenyl), 7.80 – 7.62 (m, 10H, *m, p-*phenyl*H*), 7.38 – 7.28 (m, 2H , *m,p*-phenyl*H*)*,* 6.25 (s, 2H, benzocrown-phenyl*H*), 5.18 (s, 1H, benzocrown-phenyl*H*), 4.85 (s, 2H, benzyl*H*), 3.68 – 3.59 (m, 2H, crownethylene*H*), 3.52 – 3.48 (m, 2H, crownethylene*H*), 3.47 – 3.36 (m, 6H, crownethylene*H*), 3.34 – 3.26 (m, 2H, crownethylene*H*), 3.18 – 3.08 (m, 2H, crownethylene*H*), 2.58 – 2.48 (m, 2H, crownethylene*H*), 1.52 – 1.42 (m, 2H, crownethylene*H*), 1.41 – 1.32 (m, 2H, crownethylene*H*), -2.7 (s, br, 2H, imino*H* ). UV-Vis (toluene, nm) : 419.0, 514.0, 547.5, 590.0, 645.5.

**ZnTPP-*o-*benzo-[18-crown-6] (6):** The free-base porphyrin **5** ( 100 mg, 0.105 mmol ), was dissolved in CHCl3 (20 ml), a saturated solution of zinc acetate in methanol was added to the solution, and the resulting mixture was refluxed for 2h. The course of the reaction was followed spectrophotometrically by the disappearance of the 514.0 nm band of **5**. At the end, the reaction mixture was washed with water and dried over anhydrous Na2SO4. Chromatography on basic alumina using CHCl3 : EtOAc (80:20 v/v) as eluent gave the title compound. Yield: ~ 90 %. 1H NMR (CHCl3-d): (in ppm) 8.86– 8.74 (m, 8H, **-pyrrolic*H* ), 8.14 – 8.0 (m, 6H, *o*-phenyl*H* ), 7.78 (dd, 1H, ortho-*H*- meso substituted phenyl), 7.73 – 7.57 (m, 10H, *m, p-*phenyl*H*), 7.31 – 7.17 (m, 2H , *m,p*-phenyl*H*), 6.23 – 6.15 (m, 1H, benzocrown-phenyl*H*), 5.91 (d, 1H, benzocrown-phenyl*H*), 4.99 (m, 1H, benzocrown-phenyl*H*), 4.81 (s, 2H, benzyl*H*), 3.08 – 2.92 (m, 2H, crownethylene*H*), 2.65 – 2.40 (m, 8H, crownethylene*H*), 2.32 – 2.2 (m, 2H, crownethylene*H*), 1.72 – 1.62 (m, 2H, crownethylene*H*), 1.2 – 1.1 (m, 2H, crownethylene*H*), 1.08 – 0.98 (m, 2H, crownethylene*H*), 0.76 – 0.62 (m, 2H, crownethylene*H*). UV-Vis (toluene, nm) : 424.5, 552.0, 592.5. ESI mass in CH2Cl2 calcd: 1018.5; found : m/z 1018.3 ( M+ ), 1049.2 (M+ + MeOH ).

**Fullerene bearing pyridine and ammonium cation moieties, 3PyC60lys:** To a 100 mg (0.138 mmol) of C60 in toluene, 100 mg (0.406 mmol) of H lys(Boc)-OH and 76 L of 3-pyridine carboxyaldehyde was added and refluxed for 3 h. The solvent was evaporated by vacuum, purified on silica gel using toluene and ethylacetate [8:2] to obtain 3PyC60lys-Boc. Yield = 62%. Next, to a dichloromethane solution of **3PyC60lys-Boc** (75 mg in 5 ml), 3 ml of trifluroacetic acid, and 50 L of m- cresol was added and stirred for 3 hours.4 The solvent and acid were removed under vacuum and the solid product was washed in toluene several times to desired 3PyC60NH3+. Yield = 97%. 1H NMR (CD3OD) : (in ppm) 9.13, 8.60, 8.48, 7.64(s, d, t, t, 4H, 3 pyridine-H), 6.15, 5.17, 5. 14, (s, d, d, 3H, pyrolidine-H) , 3.01-1.94 (d, m, m, m, 8H, -(CH2)4-). ESI mass in CH2Cl2, calcd: 912; found: 912.8. UV-Vis (in MeOH, nm) 204, 254.5.

**Instrumentation**. The UV-visible spectral measurements were carried out with a Shimadzu Model 1600 UV-visible spectrophotometer. The fluorescence emission was monitored by using a Spex Fluorolog-tau spectrometer. The 1H NMR studies were carried out on a Varian 400 MHz spectrometer. Tetramethylsilane (TMS) was used as an internal standard. The computational calculations were performed by *ab initio* B3LYP/3-21G(*) methodswith GAUSSIAN 03 software package on a high speed computer. The graphics of the HOMO and LUMO coefficients were generated with the help of *GaussView* software. The ESI-mass spectral analyses of the newly synthesized compounds were performed by using a Fennigan LCQ-Deca mass spectrometer.

**References :**

1. D’Souza, F.; Deviprasad, G. R.; El-Khouly, M. E.; Fujitsuka, M.; Ito, O. *J. Am. Chem. Soc.* **2001**, 123, 5277.

2. Smith, K.M. *Porphyrins and Metalloporphyrins*; Elsevier: New York, 1977.

3. O. P. Kryatova, A. G. Kolchinski and E. V. Rybak-Akimova. *Tetrahedron*, **2003**, 59, 231.

4. F. Pellarini, D. Pantarotto, T. Da Ros, A. Giangaspero, A. Tossi, and M. Prato, *Org. Lett*., **2001**, 3, 1845.

**Figure**. 1H NMR spectrum of (a) 3pyC60NH3+ (functionalized fullerene in Chart 1), (b) 3pyC60NH3+ + 0.25 eq. ZnP crown (zinc porphyrin receptor in Chart 1), (c) 3pyC60NH3+ + 0.50 eq. ZnP crown, (d) 3pyC60NH3+ + 1.0 eq. ZnP crown, and (e) ZnP porphyrin receptor in CDCl3:CD3OD (1:1 v/v). The * represents the solvent peaks.

**Figure**. Fluorescence spectrum of the zinc porphyrin receptor (2.1 x 10-6 mol dm-3) on increasing addition of functionalized fullerene in Chart 1 (0.30 eq. each addition). The inset plot shows the Bensi-Hildebrand plot of obtaining the binding constant.

**Figure**. Fluorescence decays of (a) the ‘two-point’ bound zinc porphyrin-fullerene supramolecular complex shown in Chart 1 (0.1 mM) and (b) reference compound, zinc tetraphenylporphyrin in PhCN, Excitation wavelength = 410 nm.
